# Supplementary material for: Sensitive detection of acid phosphatase enzyme and screening of inhibitors using an anionic polyfluorene derivative
Source: Royal Society of Chemistry journal article supplement (doi:10.1039/c3ay40233a), 2013-01-01
Supplement: c3ay40233a.pdf [file c3ay40233a.pdf]

## Electronic Supplementary Information

# Sensitive Detection of Acid Phosphatase Enzyme and Screening of Inhibitors Using an Anionic Polyfluorene Derivative

*Atul K. Dwivedi and Parameswar K. Iyer\**

Department of Chemistry, Indian Institute of Technology Guwahati, Guwahati-781039. India

E-mail: [pki@iitg.ernet.in](mailto:pki@iitg.ernet.in)

FAX: +91-361-2582349

Phone: +91-361-2582314

## Reagents and materials

All the reagents and solvents were purchased from Aldrich Chemicals (India), Merck (India) or Ranbaxy (India) and were used as received. Milli-Q water was used in all the experiments. Acid phosphatase (ACP) from potato lyophilized (3.0-10 units/mg solid) powder was obtained from Sigma.

## Instrumentation

Fluorescence spectra were carried out on a Varian Cary Eclipse Spectrometer. A 10 mm X 10 mm quartz cuvette was used for solution spectra and emission was collected at 90° relative to the excitation beam. Deionized water obtained by Milli-Q system (Millipore) was used.

## Synthesis of P1:

The synthesis of polymer P1 was performed as per our earlier method. (A. K. Dwivedi, G. Saikia, P. K. Iyer, *J. Mater. Chem.*, **2011**, *21*, 2502–2507.)

## Fluorescence quenching and dequenching experiments:

The experiments were carried out in 15 mM Tris-HCl buffer solution of acidic pH 6.0. The addition of 3  $\mu\text{M}$   $\text{Fe}^{3+}$  solution was able to quench the fluorescence of P1 (0.6  $\mu\text{M}$ ) solution. For the dequenching experiment two samples containing 40  $\mu\text{M}$  of P<sub>i</sub> and 40  $\mu\text{M}$  of pNPP were prepared and incubated with P1/ $\text{Fe}^{3+}$  solution and fluorescence intensity changes were observed immediately and after 8 hours.

## Real Time acid phosphatase assay:

The experiments were carried out in 15 mM Tris-HCl buffer solution of acidic pH 6.0. Fluorescence quenching experiment was performed as described above. Six samples containing P1- $\text{Fe}^{3+}$  and 40  $\mu\text{M}$  pNPP in 15 mM Tris-HCl buffer solution at pH 6.0 were prepared followed by the addition of different concentration of enzyme, say 0 nM, 4 nM, 8 nM, 14 nM, 20 nM and 28 nM and fluorescence intensity changes were monitored at the emission intensity 411 nm with increasing concentration of ACP as a function of time.

## Detection Limit:

Assay was used to monitor the ACP catalyzed pNPP hydrolysis as a function of time upon incubation with different concentration of ACP (0-28 nM). Limit of Detection (LOD) was calculated by using the following equation:

$$\text{LOD} = 3\sigma/K$$

Where  $\sigma$  is the standard deviation and  $K$  is the slope of linear plot between fluorescence intensity and ACP concentration.

#### **Calculation of product p-nitro phenol (pNP) concentration:**

First, unhydrolyzed pNPP concentration was determined at different times from the obtained fluorescence intensity curves by using the following equation.

$$[S]_t = [S]_0 [(I_0/I_t - 1) / (I_0/I_q - 1)]$$

Where  $[S]_t$  is the substrate concentration at a time  $t$ ,  $[S]_0$  is the initial substrate concentration,  $I_0$  is the initial fluorescence intensity of P1,  $I_t$  is the fluorescence intensity at time  $t$  and  $I_q$  is quenched fluorescence intensity of P1. Product concentration was then calculated by the following equation

$$[\text{pNP}] = [S]_0 - [S]_t$$

#### **Calculation of Kinetic Parameters:**

Different initial concentrations of substrate from 0 to 40  $\mu\text{M}$  were chosen and fluorescence intensity changes were recorded as a function of time to calculate the kinetics parameters.

Lineweaver-Burk plot was obtained by using the double reciprocal of initial rate vs substrate concentration.

$$1/V = K_m/V_{\max} [S]_0 + 1/V_{\max}$$

Where,  $V$  is the initial rate and calculated from the slopes of the plots  $[S]_0$  is the initial substrate concentration,  $K_m$  is the Michaelis constant and  $V_{\max}$  is the maximal velocity.

#### **Real Time acid phosphatase assay in the presence of inhibitor:**

The experiments were carried out in 15 mM Tris-HCl buffer solution of acidic pH 6.0. Fluorescence quenching experiments were performed as described above. Six samples containing P1- $\text{Fe}^{3+}$  and 40  $\mu\text{M}$  pNPP and 28 nM in 15 mM Tris - HCl buffer solution at pH 6.0 were prepared followed by the addition of different concentration of inhibitor, say 0 nM, 10 nM, 50 nM, 100 nM, 200 nM and 500 nM and fluorescence intensity changes were monitored at the emission intensity 411 nm with increasing concentration of inhibitor as a function of time.
